# Supplementary material for: Molecular Characterization of HN1304M, a Cat Que Virus Isolated from Midges in China
Source: MDPI journal article supplement (doi:10.3390/pathogens11091049), 2022-09-15
Supplement: s1 [file s1]

Supplementary Table S1. PCR primers used for the preliminary identification of the HN1304M virus.

| Genus or species            | Name of primer | Amplified segment | Sequence of primers (5'-3')         | Length of amplified region (bp) |
|-----------------------------|----------------|-------------------|-------------------------------------|---------------------------------|
| Flavivirus                  | FU1            | NS5               | TAC AAC ATG ATG GGA AAG AGA GAG AA  | 266                             |
|                             | cFD2           |                   | GTG TCC CAG CCG GCG GTG TCA TCA GC  |                                 |
| Alphavirus                  | M2W(+)         | NSP1              | YAG AGC DTT TTC GCA YST RGC HW      | 434                             |
|                             | cM3W           |                   | ACA TRA ANK GNG TNG TRT CRA ANC CDA |                                 |
|                             |                |                   | YCC                                 |                                 |
|                             | M2W2(+)        |                   | TGY CCN VTG MDN WSY VCN GAR GAY CC  | 310                             |
| Bunyavirus                  | BUP            | S                 | ATG ACT GAG TTG GAG TTT GAT GTC GC  | 251                             |
|                             | BDW            |                   | TGT TCC TGT TGC CAG GAA AAT         |                                 |
| Banna virus                 | BAV-12-854-S   | 12S               | AAA TTG ATA GYG YTT GCG TAA GAC     | 850                             |
|                             | BAV-12-B2-R    |                   | GTT CTA AAT TGG ATA CGG CGT GC      |                                 |
| Tibet orbivirus             | 6-4-2F         | 4S                | CGA CAG ACC AAA AGA TAT             | 848                             |
|                             | 6-4-2R         |                   | TCA ACA CGT AAT CCA ATA             |                                 |
| Japanese encephalitis virus | JE-955F        | E                 | TGY TGG TCG CTC CGG CTT A           | 1581                            |
|                             | JE-2536R       |                   | AAG ATG CCA CTT CCA CAY CTC         |                                 |
| Densovirus                  | DNV-F          | NS1               | AAC CGT TGG TGA CCT CTA CCC AC      | 1105                            |
|                             | DNV-R          |                   | GAT TTT CCC ATT GCT GTG CCG TTG     |                                 |
| Totivirus                   | Toti2-947F     |                   | GCA ATG GAG AAC AAA TTC ACG         | 825                             |
|                             | Toti2-1771R    |                   | CTG GTG TGC TTG TTT CTG TTT C       |                                 |
| Oya virus                   | Oya-1F         | S                 | AGT AGT GTA CTC CAC AAT TCA AAA     | 966                             |
|                             | Oya-966R       |                   | AGT AGT GTG CTC CCA ATT CAA AGA     |                                 |

Supplementary Table S2. Primers used for amplifying the whole genome sequence of HN1304M.

| Primer | Gene segment | Sequence (5'-3')               | Length of amplified region (nt) |
|--------|--------------|--------------------------------|---------------------------------|
| L1F    | L            | AGTAGTGTACCCCTAGGTTACAACATAC   | 995                             |
| L994R  |              | TCTGAGTTGGGGGACCAGAT           |                                 |
| L890F  | L            | GGGATGGGCAGAAATGGTTG           | 806                             |
| L1695R |              | TGTCTGAACTCGGCATCACAA          |                                 |
| L1507F | L            | GTGCAAGTGGA AAAATGTGGGA        | 749                             |
| L2255R |              | AACTTTGCCGGGAAACCAGA           |                                 |
| L1758F | L            | GTTGCGCACCTTGTTTCATT           | 1417                            |
| L3174R |              | GGCCAAGGTCATCTAGGCTG           |                                 |
| L2897F | L            | GGGTCAGAAGACGGCTAAAG           | 1386                            |
| L4282R |              | CCCATCCCATCATCAGTGGT           |                                 |
| L3894F | L            | TGCCCCGGCATCATTAGCAT           | 1427                            |
| L5320R |              | TGAACCTCCAAATCTGGCGAA          |                                 |
| L4858F | L            | GCAGGATGCCAGAAATGAGG           | 1344                            |
| L6201R |              | GGGACGCTTGAGCCATTGTA           |                                 |
| L6060F | L            | GCCACAGTTAGGAAGGCACA           | 869                             |
| L6928R |              | AGTAGTGTGCCCCTAGGAACATTAATATAC |                                 |
| M1F    | M            | AGTAGTGTACTACCACATACAACAAAC    | 1326                            |
| M1326R |              | CCACAGATACATGTCCCGCA           |                                 |
| M984F  | M            | CCTGGTCATTCATCTCTGCCA          | 1493                            |
| M2476R |              | ATCCGCATCTAGCCTAGGGA           |                                 |
| M2283F | M            | TTTGCAAAGAGCCCCACTCTA          | 1490                            |
| M3772R |              | CCCAAGTGCAATCCGGAAGT           |                                 |
| M3455F | M            | CCAGCTCTTATGGGCTTGAGG          | 1027                            |
| M4481R |              | AGTAGTGTGCTACCACGTACAAACATTC   |                                 |
| S1F    | S            | AGTAGTGTACTCCACAATTCAAAAAC     | 657                             |
| 657R   |              | ATGCTGCCCTAATTGCCACT           |                                 |
| S396F  | S            | GTCCGTGAGGCAGTTATCAT           | 589                             |
| S984R  |              | AGTAGTGTGCTCCCAATTC            |                                 |

Supplementary Table S3. Viral strains used in phylogenetic analysis of the isolated HN1304M virus in this study.

| Species complex                   | Species | Name of strains | Year of isolation | Isolated from                 | Host                           | GenBank accession number |           |           |
|-----------------------------------|---------|-----------------|-------------------|-------------------------------|--------------------------------|--------------------------|-----------|-----------|
|                                   |         |                 |                   |                               |                                | S segment                | M segment | L segment |
| Manzanilla                        |         | GD18234         | 2018              | China                         | Mite                           | MK609492                 | MK609490  | MK609491  |
|                                   |         | SC0806          | 2008              | China                         | Mosquito                       | JX983192                 | JX983193  | JX983194  |
|                                   |         | VN04-2108       | 2004              | Vietnam                       | <i>Culex</i> sp.               | NC024075                 | NC024074  | NC024076  |
| <i>Cat Que orthobunyavirus</i>    |         | JM1             | 1961              | India                         | <i>Acridotheres fuscus</i>     | MH507153                 | MH507152  | MH507151  |
|                                   |         | NIV86209        | 1986              | India                         | <i>Homo sapiens</i>            | KY795950                 | KY795951  | KY795952  |
|                                   |         | DHL10M107       | 2010              | China                         | <i>Culex tritaeniorhynchus</i> | KP016014                 | KP016013  | KP016012  |
|                                   |         | NA              | 2000              | Malaysia                      | Pig                            | AB075611                 | NA        | NA        |
| <i>Manzanilla orthobunyavirus</i> |         | TRVL3586        | 1954              | Trinidad and Tobago: Trinidad | <i>Alouatta seniculus</i>      | KF697148                 | KF697149  | KF697150  |
| <i>Ingwavuma orthobunyavirus</i>  |         | SA An 4165      | 1959              | South Africa                  | <i>Hyphanturgus ocularis</i>   | NC043590                 | NC043589  | NC043588  |
| <i>Mermet orthobunyavirus</i>     |         | AV 782          | 1964              | USA                           | <i>Progne subis</i>            | NC043593                 | NC043592  | NC043591  |

---

|           |                                        |              |      |              |                             |          |          |          |
|-----------|----------------------------------------|--------------|------|--------------|-----------------------------|----------|----------|----------|
|           | <i>Button willow orthobunyavirus</i>   | BFS 5002     | 1964 | USA          | <i>Culicoides</i> sp.       | NC043598 | NC043599 | NC043597 |
|           | <i>Facey's Paddock orthobunyavirus</i> | Aus Ch 16129 | 1974 | Australia    | Mosquito                    | NC055186 | NC055184 | NC055185 |
| Oropouche | <i>Utinga orthobunyavirus</i>          | Be An 84785  | 1965 | Brazil       | <i>Bradypus tridactylus</i> | NC043596 | NC043595 | NC043594 |
|           | <i>Oropouche orthobunyavirus</i>       | BeAn19991    | NA   | Brazil       | <i>Bradypus tridactylus</i> | NC005777 | NC005775 | NC005776 |
| Simbu     | <i>Simbu orthobunyavirus</i>           | SA Ar 53     | 1955 | South Africa | <i>Aedes circumluteolus</i> | NC018477 | NC018478 | NC018476 |
| Shuni     | <i>Shuni orthobunyavirus</i>           | SAE1809      | 2009 | South Africa | Horse                       | NC043698 | NC043697 | NC043699 |
| Akabane   | <i>Akabane orthobunyavirus</i>         | OBE-1        | 1974 | Japan        | Bovine animals              | NC009896 | NC009895 | NC009894 |
| Shamonda  | <i>Shamonda orthobunyavirus</i>        | Ib An 5550   | 1965 | Nigeria      | Cattle                      | NC018464 | NC018467 | NC018463 |

---

---

|           |                                      |    |    |    |    |          |          |          |
|-----------|--------------------------------------|----|----|----|----|----------|----------|----------|
| Sathuperi | <i>Sathuperi<br/>orthobunyavirus</i> | NA | NA | NA | NA | NC018462 | NC018466 | NC018461 |
|-----------|--------------------------------------|----|----|----|----|----------|----------|----------|

---

NA, not available.
